# Supplementary material for: A Single cis Element Maintains Repression of the Key Developmental Regulator Gata2
Source: PLOS journal article supplement (doi:10.1371/journal.pgen.1001103), 2010-09-09

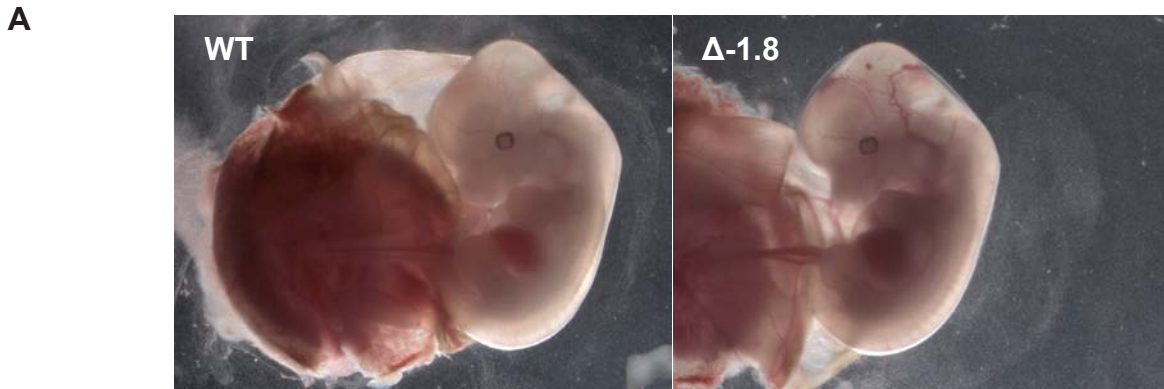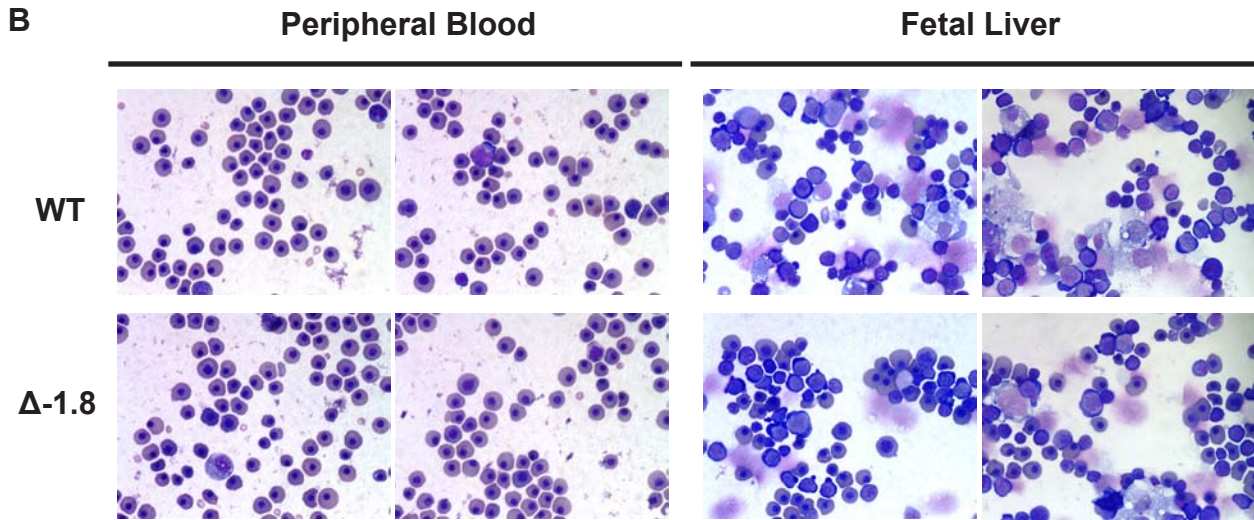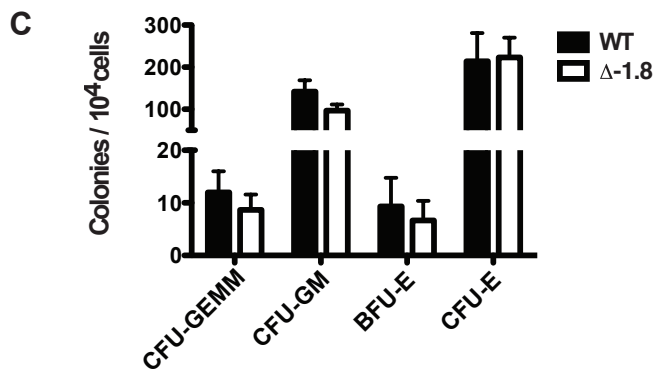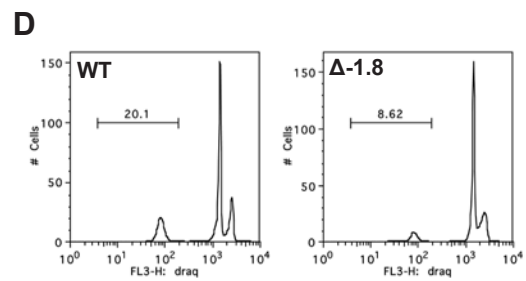

Supplement: S2 (10.1371/journal.pgen.1001103.s002) [file journal.pgen.1001103.s002]
